# Supplementary material
Source: PubMed Central journal article supplement (PMC3228905)
Supplement: NIHMS320623-supplement-Supp_Figure_S1-S7_Table_S1-S4.pdf [file NIHMS320623-supplement-Supp_Figure_S1-S7_Table_S1-S4.pdf]

**Table S1.** *B. pseudofirmus* OF4 mobile element related gene content<sup>a</sup>

| Chromosome |          |                   | pBpOF4-1  |             |                             | pBpOF4-2  |          |                   |
|------------|----------|-------------------|-----------|-------------|-----------------------------|-----------|----------|-------------------|
| Locus Tag  | Type     | IS (family/group) | Locus Tag | Type        | IS (family/group)           | Locus Tag | Type     | IS (family/group) |
| 00230      | R,Ig     |                   | 19959     | T           | IS116/IS110/IS902           | 21449     | T,Ig     | IS116/IS110/IS902 |
| 00875      | T        |                   | 20034     | T           | IS200 family                | 21554     | T        |                   |
| 00880      | T        |                   | 20039     | T           | IS605 family                | 21579     | Ig       | IS650-01          |
| 01380      | T        |                   | 20049     | T,Ig        |                             | 21604     | T        | IS4/IS641-02      |
| 01385      | T        |                   | 20054     | T,Ig        |                             | 21729     | R,Ig     |                   |
| 01465      | T        |                   | 20059     | T           |                             | 21794     | R        |                   |
| 01470      | T        |                   | 20139     | R,Ig        |                             | 21799     | R,Ig     |                   |
| 01760      | En       |                   | 20144     | R,Ig        |                             | 21819     | T        |                   |
| 02705      | T        | IS653-01          | 20174     | T           |                             | 21824     | R,Iv,Res |                   |
| 03680      | T,Ig     |                   | 20179     | T           | IS204/IS1001/IS1096/IS1165  | 21974     | En       |                   |
| 03690      | T,Ig     | IS116/IS110/IS902 | 20209     | T           | IS4/IS641-02                | 21989     | R,Iv     |                   |
| 03730      | En       |                   | 20219     | In,RT       | group II intron             | 22024     | R,Iv     |                   |
| 03755      | T        | IS4/IS641-02      | 20224     | RT,Ret      | Bh.Int-03 (group II intron) |           |          |                   |
| 03770      | R,Ig     |                   | 20229     | RT,Ret      | Bh.Int-03 (group II intron) |           |          |                   |
| 03775      | R,Ig     |                   | 20244     | T,Ig        | IS116/IS110/IS902           |           |          |                   |
| 04275      | Res      |                   | 20274     | T           |                             |           |          |                   |
| 04310      | En,Res   |                   | 20524     | T           | IS643-02                    |           |          |                   |
| 04420      | R,Iv,Res |                   | 20529     | T           | IS643-02                    |           |          |                   |
| 04550      | R        |                   | 20539     | R,Ig        |                             |           |          |                   |
| 04620      | T        | IS4/IS641-02      | 20659     | RT,Ret      | group II intron             |           |          |                   |
| 05240      | En       |                   | 20684     | RT,M,In,Ret | Bh.Int-03 (group II intron) |           |          |                   |
| 06065      | T        |                   | 20709     | T           | IS643-02                    |           |          |                   |
| 06070      | T        |                   | 20714     | T           | IS643-02                    |           |          |                   |
| 06175      | En       |                   | 20849     | RT,Ret      | group II intron             |           |          |                   |
| 06390      | Res      |                   | 20889     | T           |                             |           |          |                   |
| 06405      | T        |                   | 20949     | T           | IS605 family                |           |          |                   |
| 06430      | T,R,Iv   |                   | 20954     | T           | IS200 family                |           |          |                   |
| 06455      | T        |                   | 20989     | T           | IS116/IS110/IS902           |           |          |                   |
| 06485      | T        |                   | 20994     | T           | IS116/IS110/IS902           |           |          |                   |
| 06495      | T        |                   | 21004     | T           | IS116/IS110/IS902           |           |          |                   |
| 06500      | T        |                   | 21164     | T           |                             |           |          |                   |
| 07430      | En       | IS66              | 21339     | R,Ig        |                             |           |          |                   |

|       |        |                   |       |   |                   |
|-------|--------|-------------------|-------|---|-------------------|
| 07525 | T      |                   | 21424 | T | IS116/IS110/IS902 |
| 07530 | T      |                   |       |   |                   |
| 08130 | En     |                   |       |   |                   |
| 08855 | T      |                   |       |   |                   |
| 08860 | T      |                   |       |   |                   |
| 09820 | T      | IS653-01          |       |   |                   |
| 09825 | T      | IS653-01          |       |   |                   |
| 10075 | T      | IS4/IS641-02      |       |   |                   |
| 10640 | T      |                   |       |   |                   |
| 10805 | Ig     | ISBma2            |       |   |                   |
| 11875 | En,Res |                   |       |   |                   |
| 11935 | T      |                   |       |   |                   |
| 11940 | T      |                   |       |   |                   |
| 12295 | Ig     |                   |       |   |                   |
| 13035 | T      | IS4/IS641-02      |       |   |                   |
| 13535 | T      | IS653-01          |       |   |                   |
| 14295 | T      |                   |       |   |                   |
| 14300 | T      |                   |       |   |                   |
| 14750 | R,Ig   |                   |       |   |                   |
| 15680 | T      | IS653-01          |       |   |                   |
| 16060 | R,Ig   |                   |       |   |                   |
| 16155 | En     |                   |       |   |                   |
| 16590 | RT     | group II intron   |       |   |                   |
| 17130 | T,Ig   | IS116/IS110/IS902 |       |   |                   |
| 17245 | T      |                   |       |   |                   |
| 19435 | R,Iv   |                   |       |   |                   |
| 19490 | Ig     |                   |       |   |                   |

---

**a.** Annotations from PGAAP were searched for Transposons (T), Recombinases (R), Reverse Transcriptases (RT), Maturases (M), Endonucleases (En), Invertases (Iv), Integrases (Ig), Introns (In), Retrons (Ret) and Resolvases (Res). For the chromosome, there were 59 total, representing 1.5% of the total ORFS; for pBpOF4-1, there were 33 total, or 11.3% of total ORFS; and for pBpOF4-2, there were 12 total, or 9.8% of total ORFS.

**Table S2.** Sigma factors in the *Bacillus pseudofirmus* OF4 chromosome<sup>a</sup>

| <i>A. Growth, motility, general stress</i> | Accession #  | Locus Tag   |
|--------------------------------------------|--------------|-------------|
| 1. Sig70                                   | YP_003426643 | BpOF4_08465 |
| 2. Sig70 (rpoS/rpoD domains)               | YP_003428371 | BpOF4_17190 |
| 3. SigD                                    | YP_003424974 | BpOF4_00065 |
| 4. SigD2                                   | YP_003426183 | BpOF4_06145 |
| 5. SigD3                                   | YP_003427689 | BpOF4_09205 |
| 6. SigB                                    | YP_003426789 | BpOF4_09205 |
| <i>B. ECF</i>                              |              |             |
| 7. SigC                                    | YP_003427382 | BpOF4_12185 |
| 8. SigC2                                   | YP_003428211 | BpOF4_16370 |
| 9. SigL                                    | YP_003426015 | BpOF4_05305 |
| 10. SigM                                   | YP_003428452 | BpOF4_17595 |
| 11. Sig V                                  | YP_003428217 | BpOF4_16400 |
| 12. SigW                                   | YP_003426710 | BpOF4_08800 |
| 13. SigX                                   | YP_003427643 | BpOF4_13500 |
| 14. SigY                                   | YP_003427988 | BpOF4_15235 |
| 15. SigZ                                   | YP_003427375 | BpOF4_12150 |
| 16. Sig54 (Fis)                            | YP_003426988 | BpOF4_10215 |
| 17. Sig54 (Fis)                            | YP_003426213 | BpOF4_06305 |
| <i>C. Sporulation</i>                      |              |             |
| 18. SigE                                   | YP_003425086 | BpOF4_00625 |
| 19. SigF                                   | YP_003427908 | BpOF4_14835 |
| 20. SigG                                   | YP_003425085 | BpOF4_00620 |
| 21. SigK                                   | YP_003427542 | BpOF4_12995 |

**a.** Assignments are based on BLASTP analyses; the first listed Sig70 is the closest homologue of Sig70 from *B. subtilis*

**Table S3.** Two-component signaling systems of *B. pseudofirmus* OF4

|                          | Accession #<br>[YP_00342..] | Locus tag<br>[BpOF4_..] | Protein | Predicted Function           |
|--------------------------|-----------------------------|-------------------------|---------|------------------------------|
| <b>Chromosome</b>        |                             |                         |         |                              |
| 1. HK <sup>a</sup>       | 5408                        | 02245                   | LytS    | Cell autolysis               |
| RR                       | 5407                        | 02240                   | LytR    |                              |
| 2. HK                    | 5442                        | 02415                   | AtoS    | Acetolactate metabolism      |
| RR                       | 5441                        | 02410                   | AtoC    |                              |
| 3. HK                    | 5464                        | 02525                   | CheA    | Chemotaxis                   |
| RR                       | 5462                        | 02515                   | CheY    |                              |
| 4. HK                    | 5628                        | 03350                   | PhoP    | Phosphate regulon            |
| RR                       | 5627                        | 03345                   | PhoR    |                              |
| 5. HK                    | 5817                        | 04305                   | YhcZ    | Nitrate respiration          |
| RR                       | 5816                        | 04300                   | YhcY    |                              |
| 6. HK                    | 6057                        | 05515                   | DcuS    | Dicarboxylate metabolism     |
| RR                       | 6058                        | 05520                   | DcuR    |                              |
| 7. HK                    | 6094                        | 05700                   | DegS    | Degradative enzyme reg.      |
| RR                       | 6093                        | 05695                   | DegU    |                              |
| 8. HK <sup>b</sup>       | 6490                        | 07700                   | KinE    | Entry into stationary phase  |
| 9. HK                    | 6515                        | 07825                   | WalK    | Peptidoglycan formation      |
| RR                       | 6516                        | 07830                   | WalR    |                              |
| 10. HK                   | 6828                        | 09405                   | CitS    | Citrate metabolism           |
| RR                       | 6827                        | 09400                   | CitT    |                              |
| 11. HK                   | 6943                        | 09980                   | BceS    | Cell wall antibiotic sensing |
| RR                       | 6944                        | 09985                   | BceR    |                              |
| 12. HK                   | 6953                        | 10030                   | DesK    | Phospholipid desaturation    |
| RR                       | 6954                        | 10035                   | DesR    |                              |
| 13. HK                   | 6961                        | 10070                   | ---     | ----                         |
| RR                       | 6960                        | 10065                   | ---     |                              |
| 14. HK <sup>b</sup>      | 7140                        | 10975                   | KinE    | Entry into stationary phase  |
| 15. HK                   | 7193                        | 11240                   | YkoH    | ----                         |
| RR                       | 7192                        | 11235                   | YkoG    |                              |
| 16. HK                   | 7230                        | 11425                   | CesS    | Secretion stress             |
| RR                       | 7229                        | 11420                   | CesR    |                              |
| 17. HK                   | 7257                        | 11560                   | LiaS    | Cell wall stress             |
| RR                       | 7258                        | 11565                   | LiaR    |                              |
| 18. HK <sup>b</sup>      | 7306                        | 11805                   | KinA    | Sporulation                  |
| 19. HK <sup>b</sup>      | 7363                        | 12090                   | ---     | GGDEF domain                 |
| 20. HK                   | 7410                        | 12325                   | ---     | ---                          |
| RR                       | 7409                        | 12320                   | ---     |                              |
| 21. HK                   | 7441                        | 12490                   | YufL    | Citrate/Malate metabolism    |
| RR                       | 7440                        | 12485                   | YufM    |                              |
| 22. HK                   | 7537                        | 12970                   | YycF    | Cell wall stress             |
| RR                       | 7538                        | 12975                   | YvrG    |                              |
| 23. HK <sup>b</sup>      | 7549                        | 13030                   | ---     | ---                          |
| 24. HK                   | 7551                        | 13040                   | ---     | Autolysin regulation         |
| RR                       | 7552                        | 13045                   | ---     |                              |
| 25. HK <sup>b</sup>      | 7700                        | 13785                   | ---     | ---                          |
| 26. HK                   | 7781                        | 14190                   | YclJ    | ---                          |
| RR                       | 7782                        | 14195                   | YclK    | ---                          |
| 27. HK <sup>b</sup>      | 7788                        | 14235                   | ---     | ---                          |
| 28. HK                   | 7848                        | 14535                   | ---     | ---                          |
| RR                       | 7847                        | 14530                   | ---     |                              |
| 29. HK                   | 7954                        | 15065                   | ResE    | Respiration                  |
| RR                       | 7953                        | 15060                   | ResD    |                              |
| 30. HK <sup>b</sup>      | 8549                        | 18080                   | NtrB    | Nitrogen metabolism          |
| 31. HK <sup>b</sup>      | 8550                        | 18085                   | KinA    | Sporulation                  |
| 32. HK                   | 8558                        | 18125                   | DcuS    | Citrate/malate               |
| RR                       | 8557                        | 18120                   | DcuR    |                              |
| 33. HK                   | 8629                        | 18480                   | ---     | ---                          |
| RR                       | 8630                        | 18485                   | ---     |                              |
| <b>Plasmid pBpOF4-01</b> |                             |                         |         |                              |
| 34. HK                   | 8949                        | 20299                   | ----    | ---                          |
| RR                       | 8950                        | 20304                   | ---     |                              |

|        |      |       |      |             |
|--------|------|-------|------|-------------|
| 35. HK | 8982 | 20474 | ResE | Respiration |
| RR     | 8983 | 20479 | ResD |             |

---

**a.** HK=sensor histidine kinase; RR=response regulator; **b.** No RR identified, **c.** --- indicates no proposed protein and/or functional designation.

**Table S4.** Chemotaxis signaling sensors of *B. pseudofirmus* OF4<sup>a</sup>

| Protein Name           | Uniprot # | Tag         | Amino acid (aa) | TMs | Motif                                  | Homologue of <i>B. halodurans</i> C-125                                                               |
|------------------------|-----------|-------------|-----------------|-----|----------------------------------------|-------------------------------------------------------------------------------------------------------|
| <i>A. Mcp and TarH</i> |           |             |                 |     |                                        |                                                                                                       |
| 1. TarH1               | D3G0X0    | BpOF4_19984 | 660             | 2   | Cache_1, marine_sort_HK, HAMP, MA      | Q9K617(BH3915), Identity 33.0%<br>Q9KFC0 (BH0565), Identity 36% (271aa)                               |
| 2. TarH2               | D3FZJ3    | BpOF4_05865 | 659             | 2   | Cache_2, marine_ HAMP, MA              | Q9KFC0 (BH0565), Identity 31% (385aa)                                                                 |
| 3. TarH3               | D3FZ89    | BpOF4_14545 | 493             | 5   | MA, TarH                               | Q9KCR0 (BH1509), Identity 47.0%                                                                       |
| 4. TarH4               | D3G0G8    | BpOF4_06925 | 431             | 2   | HAMP, MA, TarH                         | Q9K6G1 ( <i>mcpA</i> , BH3768), Identity 56.0%                                                        |
| 5. TarH5               | D3FQ85    | BpOF4_07495 | 579             | 2   | Cache_1, HAMP, Tar, MA                 | Q9KAL2 (BH2275), Identity 38.0%<br>Q9KBU7 ( <i>mcpC</i> , BH1827), Identity 34.0%                     |
| 6. TarH6               | D3FW63    | BpOF4_02640 | 580             | 2-3 | MA, TarH                               | Q9KEH6 (BH0876), Identity 29.0%(367aa)                                                                |
| 7. TarH7               | D3FYY8    | BpOF4_04785 | 556             | 2   | HAMP, MA, TarH                         | no hit                                                                                                |
| 8. TarH8               | D3FUJ9    | BpOF4_10580 | 565             | 2   | CHASE3, Ma, Tar, NtrY, NarQ, COG5278   | Q9KEH6 (BH0876), Identity 47.0%<br>Q9K632 (BH3900), Identity 33.0%<br>Q9K669 (BH3863), Identity 31.0% |
| 9. TarH9               | D3FXE5    | BpOF4_13025 | 424             | 2   | HAMP, MA, TarH                         | Q9K669 (BH3863), Identity 39.0% (381aa)                                                               |
| 10. TarH10             | D3G0H7    | BpOF4_06970 | 583             | 2   | Cache_2, MA, TarH                      | no hit                                                                                                |
| 11. TarH11             | D3FXF1    | BpOF4_13055 | 536             | 2   | MAMP, Tar                              | no hit                                                                                                |
| 12. TarH12             | D3FTM6    | BpOF4_10230 | 278             | 0   | Tar, MA                                | Q9KE52 (BH1006), Identity 29.0%                                                                       |
| <i>B. HemAT</i>        |           |             |                 |     |                                        |                                                                                                       |
| 13. HemAT1             | D3FSA7    | BpOF4_18505 | 434             | 0   | sensor_globin, heme-binding site, TarH | Q9KFH4 (BH0505), Identity 45.0% (403aa)                                                               |
| 14. HemAT2             | D3FW31    | BpOF4_12050 | 439             | 0   | sensor_globin, heme-binding site, TarH | Q9KFH4 (BH0505), Identity 33.0%                                                                       |
| 15. HemAT3             | D3FWD3    | BpOF4_02990 | 434             | 0   | sensor_globin, heme-binding site, TarH | Q9KFH4 (BH0505), Identity 25.0%                                                                       |

**a.** Assignments are based on BLASTp analyses; MCP: Methyl-accepting chemotaxis protein, TarH: Taxis toward Aspartate and Related amino acids and Homologs, HeamAT: heme-based aerotactic transducer. *Bacillus halodurans* C-125 has 11 Mcp-type and one HemAT-type proteins.

## Legends Supplementary Figures

**Fig. S1.** Predicted secondary structures of the tmRNA and associated group I intron in the chromosome of *B. pseudofirmus* OF4. The structures were predicted by alignment with the homologous sequences in *Clostridium botulinum* (Williams, 2002)) followed by manual rearrangements. Nucleotides that are conserved in both sequence and structural position in *B. pseudofirmus* and *C. botulinum* are colored in red. The various subdomains of the tmRNA (P1-P12) and group I intron (P1-P9) are indicated. In addition, for the tmRNA, the regions forming pseudoknots are labeled ( $\Psi$ 1 and  $\Psi$ 4) the nucleotides encoding the proteolysis tag are underlined; for the intron, flanking exon sequences are in lower case letters.

**Fig. S2.** Schematic representation of the 4.5-kb group II twintron in the pBpOF4-01 plasmid of *B. pseudofirmus* OF4. The twintron consists of two nested group II intron retroelements, where the innermost intron (in grey) encoding the reverse-transcriptase (RT) BpOF4\_20224 is inserted at the catalytic site of the RT (BpOF4\_20229+BpOF4\_20219) encoded by the outermost intron (in black). The catalytic site corresponds to the RYADD motif at the amino-acid level. The introns are delimited by arrows. Genes are drawn as boxes containing the gene names, with genes flanking the twintron drawn as open boxes.

**Fig. S3.** Multiple sequence alignment of the *bcr3* repeat elements from the chromosome of *B. pseudofirmus* OF4. *bcr3* is flanked by a 25-nucleotide direct repeat (DR) motif which is boxed. In addition, *bcr3* copies form two groups of sequences, *bcr3a* and *bcr3b*, that are homologous to the *bcr3* elements originally identified in bacteria from the *Bacillus cereus* group (Kristoffersen *et al.*, 2011). A *bcr3a* and a *bcr3b* copy from the *B. cereus* group (*bcr3a*\_NC\_009674\_5F-II and *bcr3b*\_NZ\_ABDK02000047\_1R, respectively) are included in the alignment for comparison. A plot of the conservation of each site was generated by CLUSTALX (Larkin *et al.*, 2007) and is shown below the alignment. Asterisks above the alignment indicate sites where all sequences have an identical nucleotide.

**Fig. S4.** Multiple sequence alignment of the *bpr1* repeat elements from the chromosome of *B. pseudofirmus* OF4. *bpr1* is made up of a CGCAATAA/CGCATAAA/CGCAATTA motif, which is boxed,

and that is repeated seven times. A plot of the conservation of each site was generated by CLUSTALX (Larkin et al., 2007) and is shown below the alignment.

**Fig. S5.** Multiple sequence alignment of the *bpr2* repeat elements from the chromosome of *B. pseudofirmus* OF4. *bpr2* is made up of two complementary regions, the left and right end, respectively, which are boxed. Partial copies corresponding either to the left or to the right end are also included in the alignment and their names start with the letter P. A plot of the conservation of each site was generated by CLUSTALX (Larkin et al., 2007) and is shown below the alignment.

**Fig. S6.** Top: Filled arrows indicate the location of perfect match *dnaA* boxes (TTATCCACA). Open arrows indicate *dnaA* boxes with a maximum of 1 mismatch. Bottom: nucleotide-level comparison of the AT-rich region in *B. subtilis* 168, *B. halodurans* C-125 and *B. pseudofirmus* OF4 that is unwound by DnaA during initiation of replication.

**Fig. S7.** Comparison of the *B. pseudofirmus* OF4 chromosome with *B. halodurans* C-125 at the gene level. Each dot represents predicted protein homology with a *B. halodurans* C-125 gene that has greater than 50% identity (the top hit). Dots lying on the X-axis represent <50% identity or no match.

Kristoffersen, S. M., N. J. Tourasse, A. B. Kolstø & O. A. Økstad, (2011) Interspersed DNA repeats *bcr1-bcr18* of *Bacillus cereus* group bacteria form three distinct groups with different evolutionary and functional patterns. *Mol. Biol. Evol.* **28**: 963-983.

Larkin, M. A., G. Blackshields, N. P. Brown, R. Chenna, P. A. McGettingan, H. McWilliam, P. Valentin, I. M. Wallace, A. Wilm, R. Lopez, J. D. Thompson, T. J. Gibson & O. G. Higgins, (2007) Clustal W and Clustal X version 2.0. *Bioinformatics* **23**: 2947-2948.

Williams, K. P., (2002) The tmRNA website: invasion by an intron. *Nucleic Acids Res*, **30**: 179-182.



## A) tmRNA

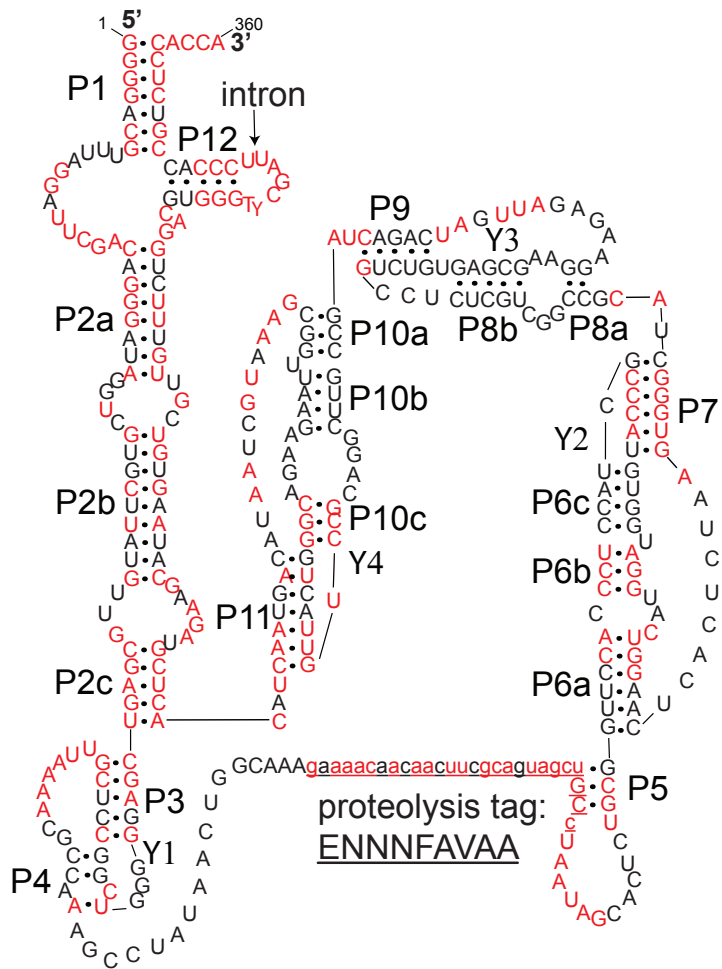

## B) group I intron

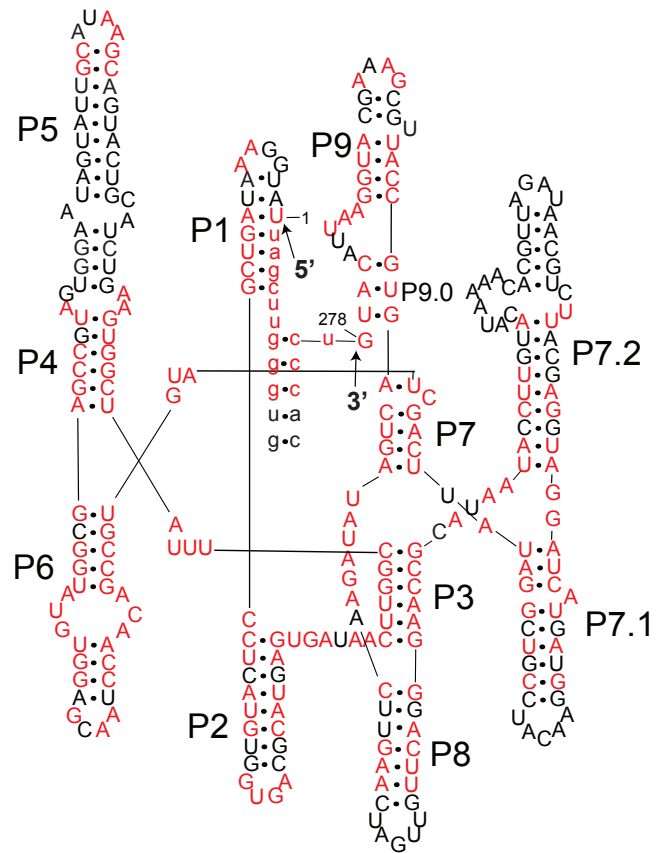

Fig. S1

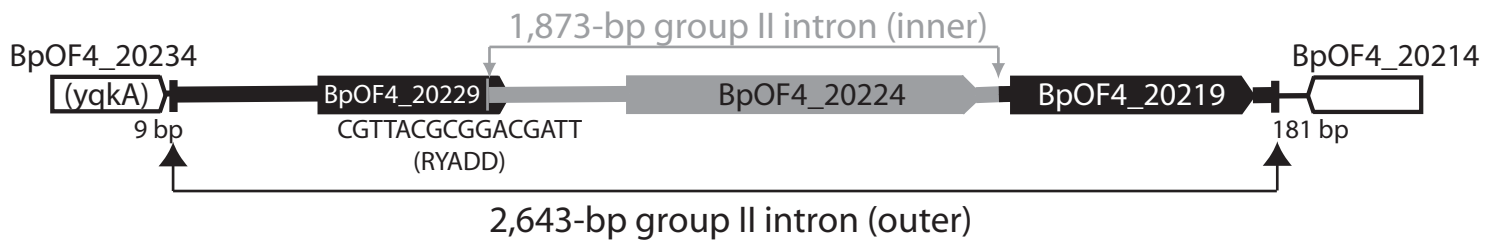

**Fig. S2**

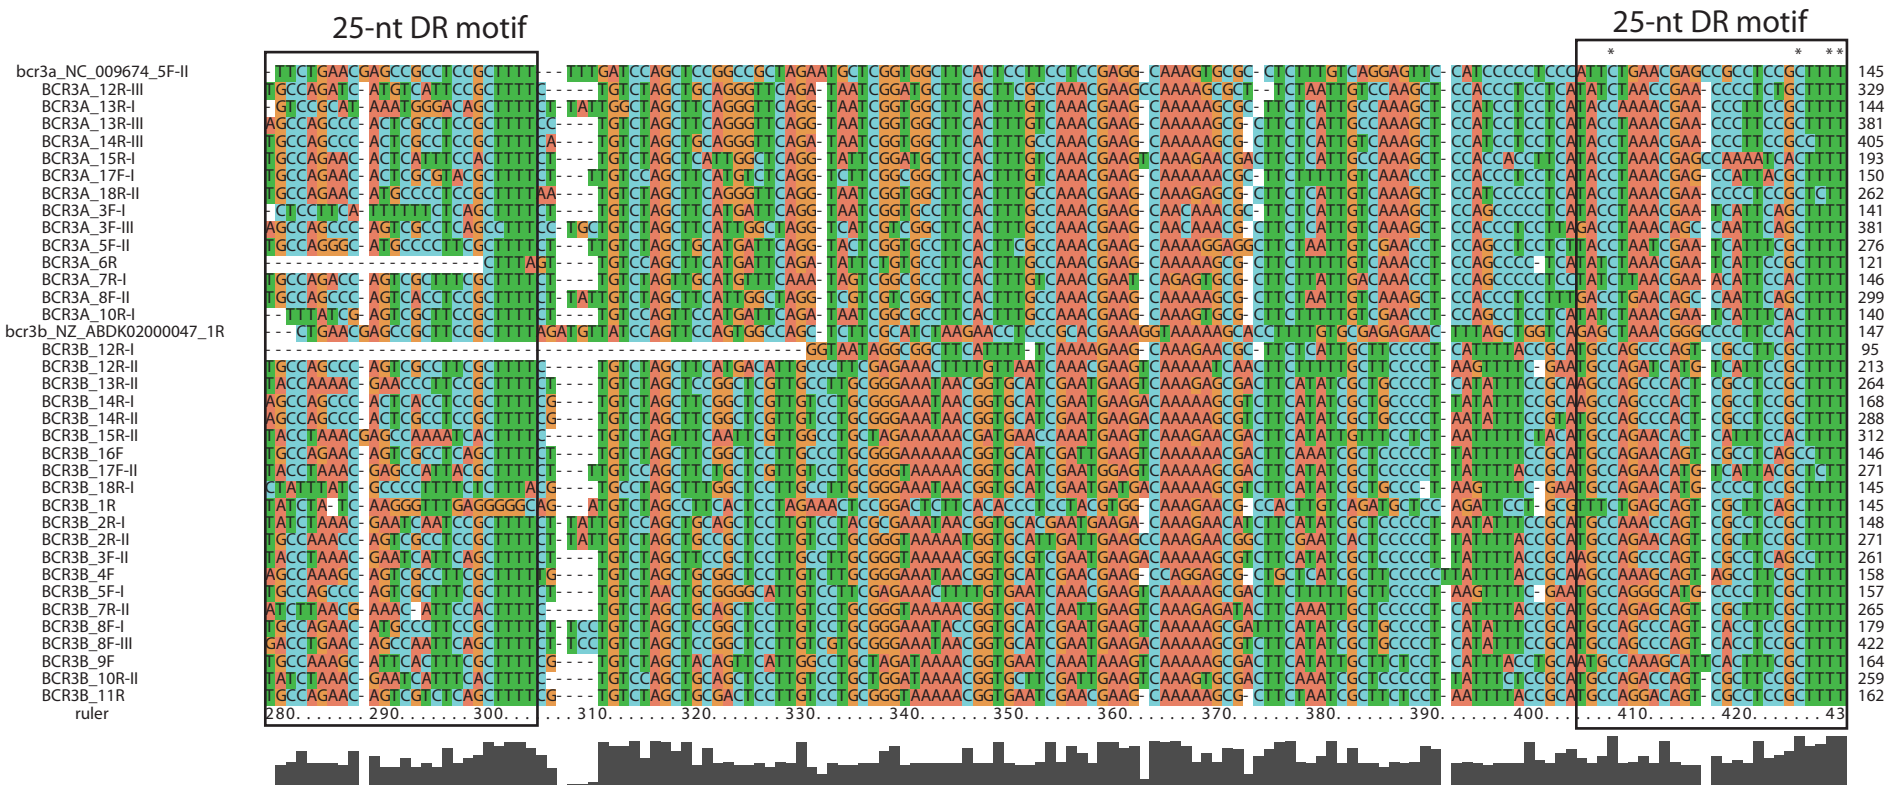

Fig. S3

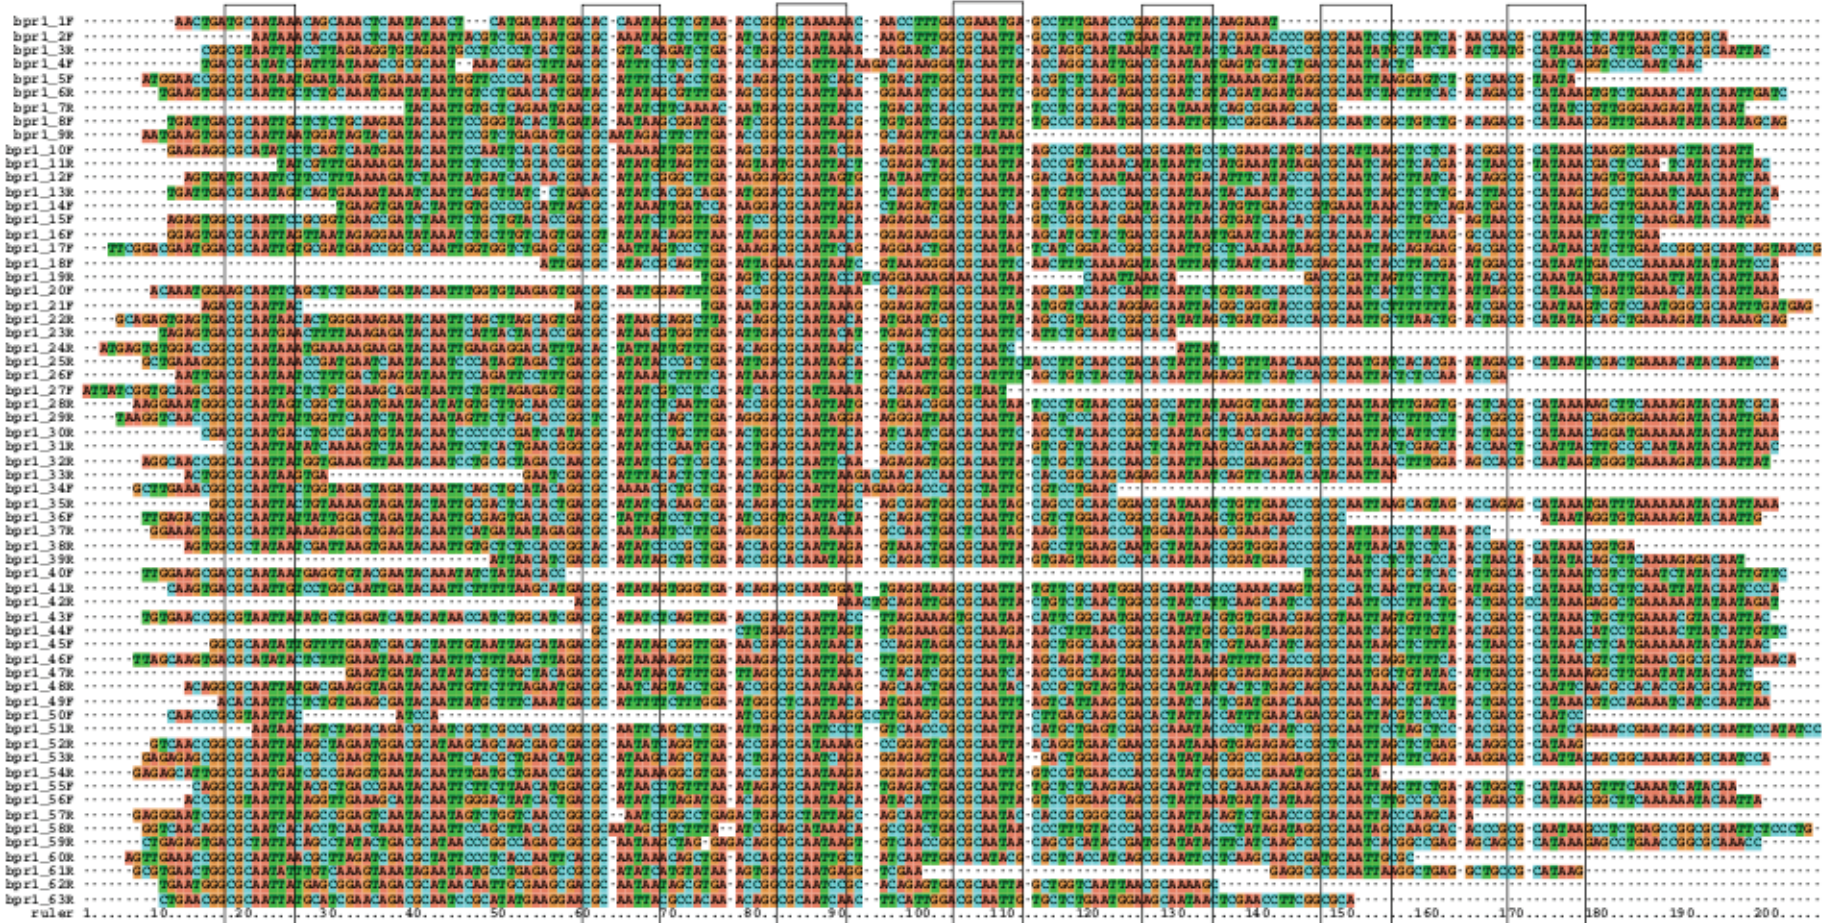

Fig. S4



Left End

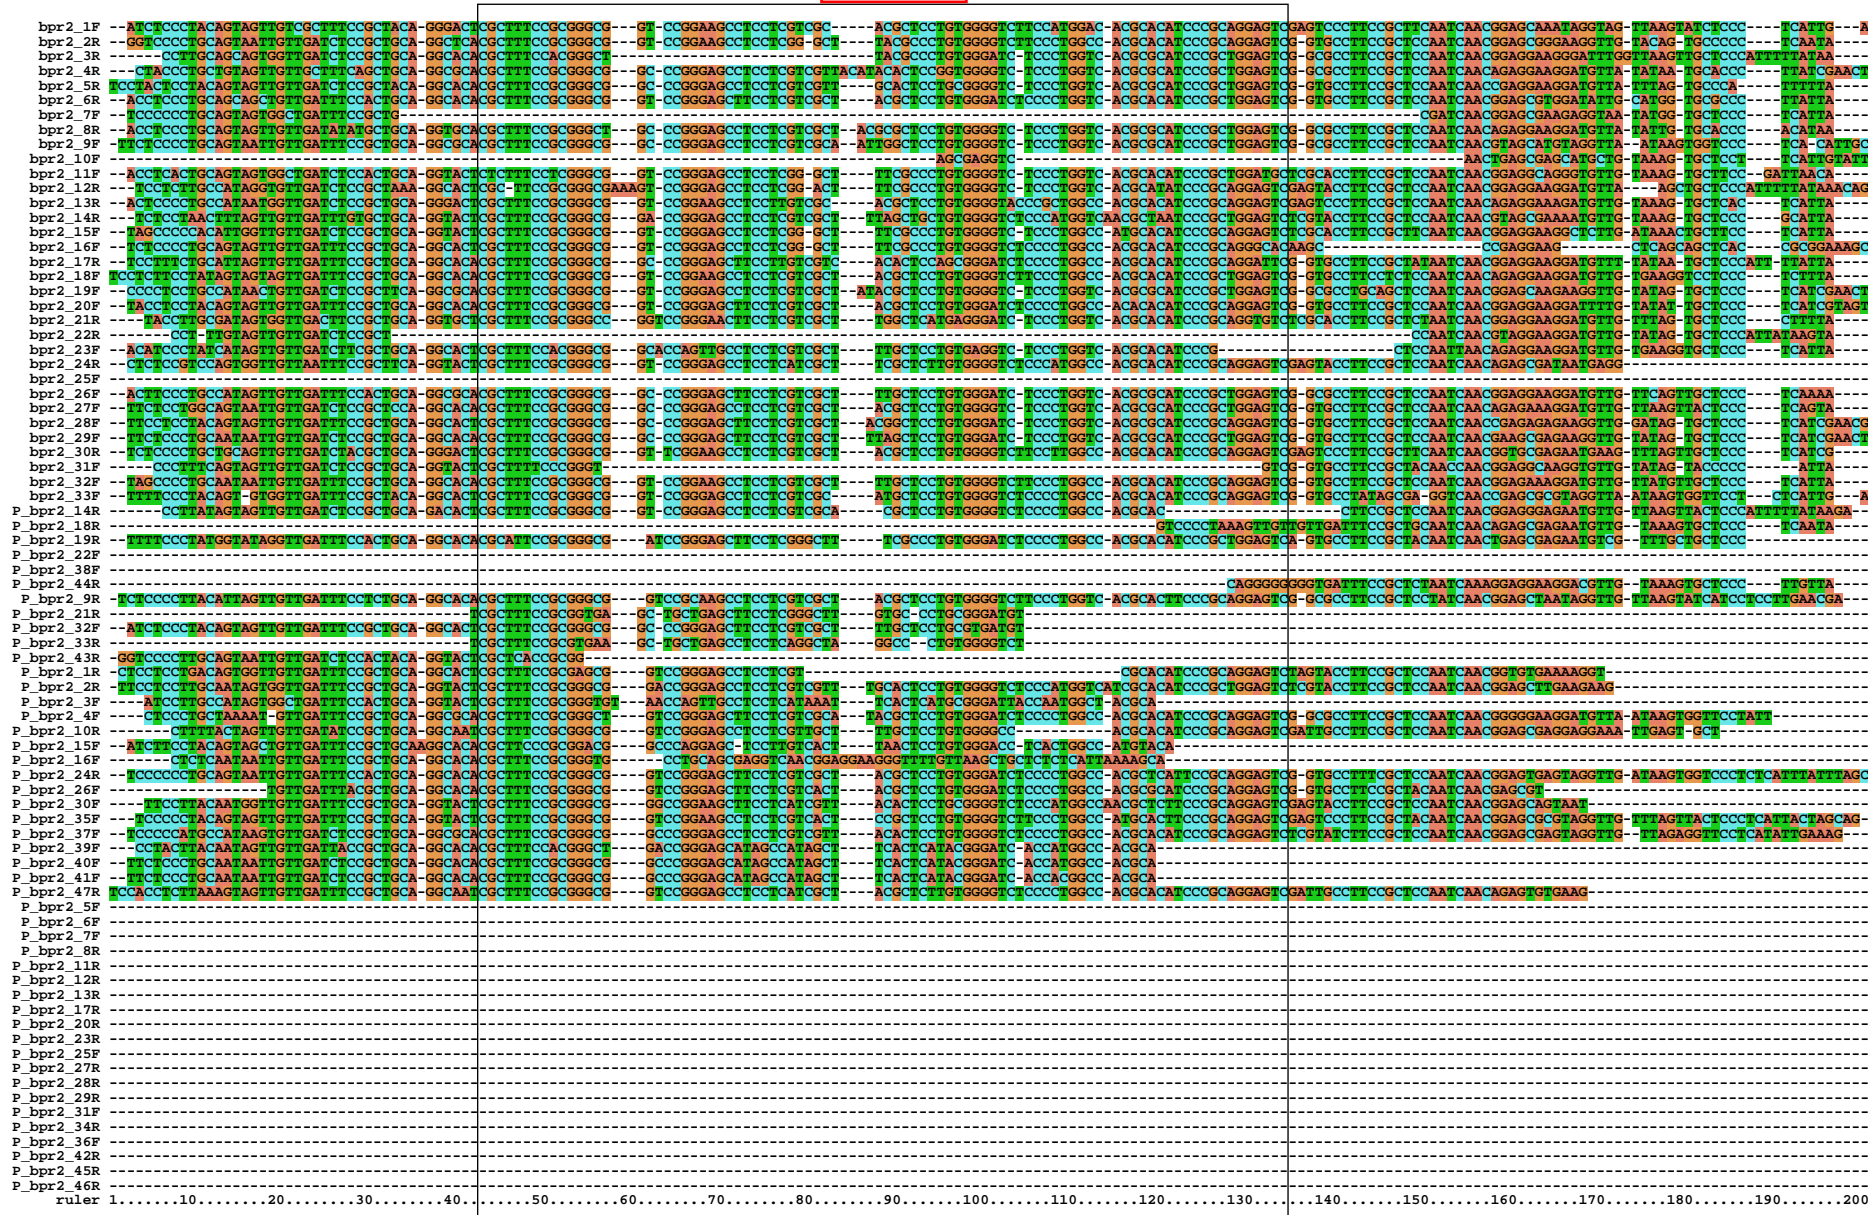

Fig.S5

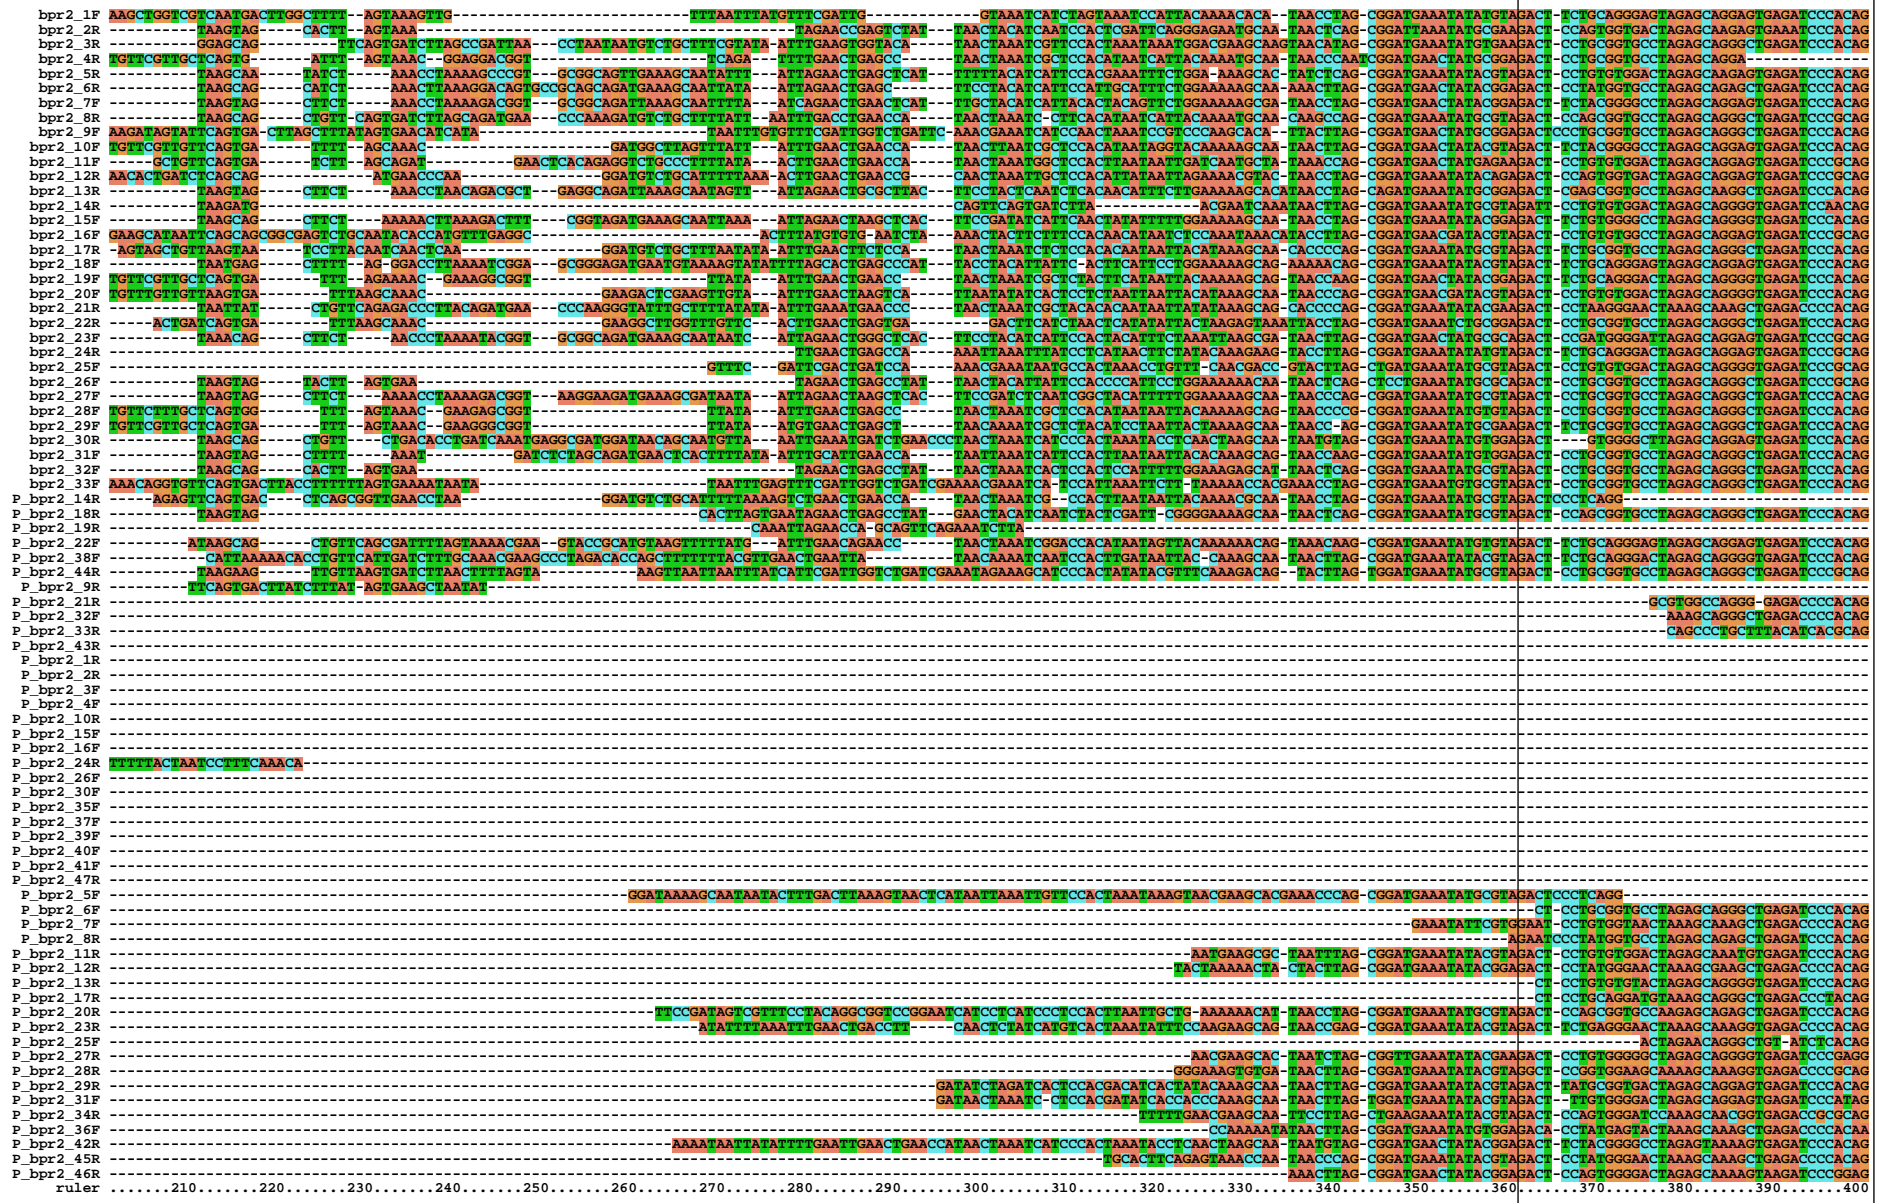

Fig.S5

Right End

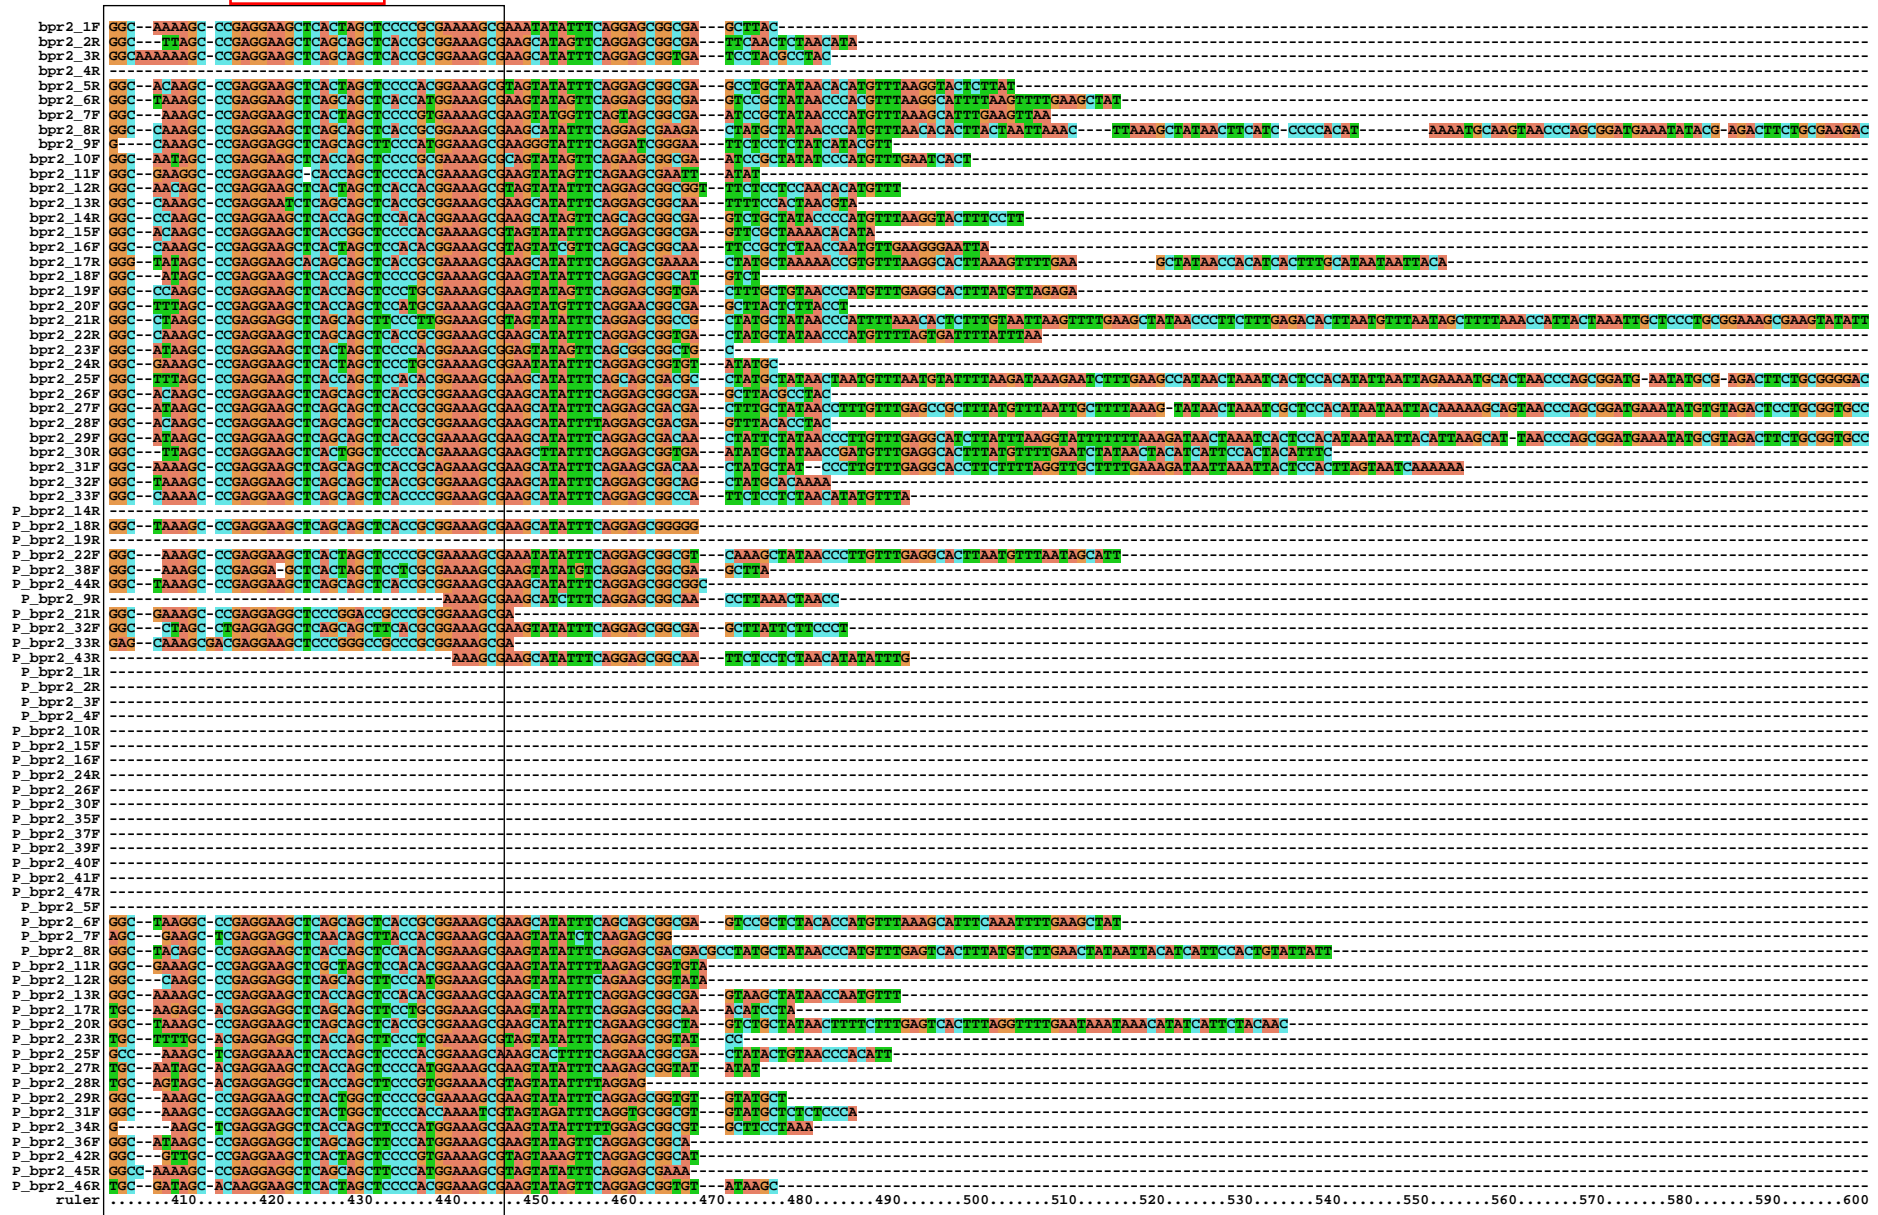

Fig.S5

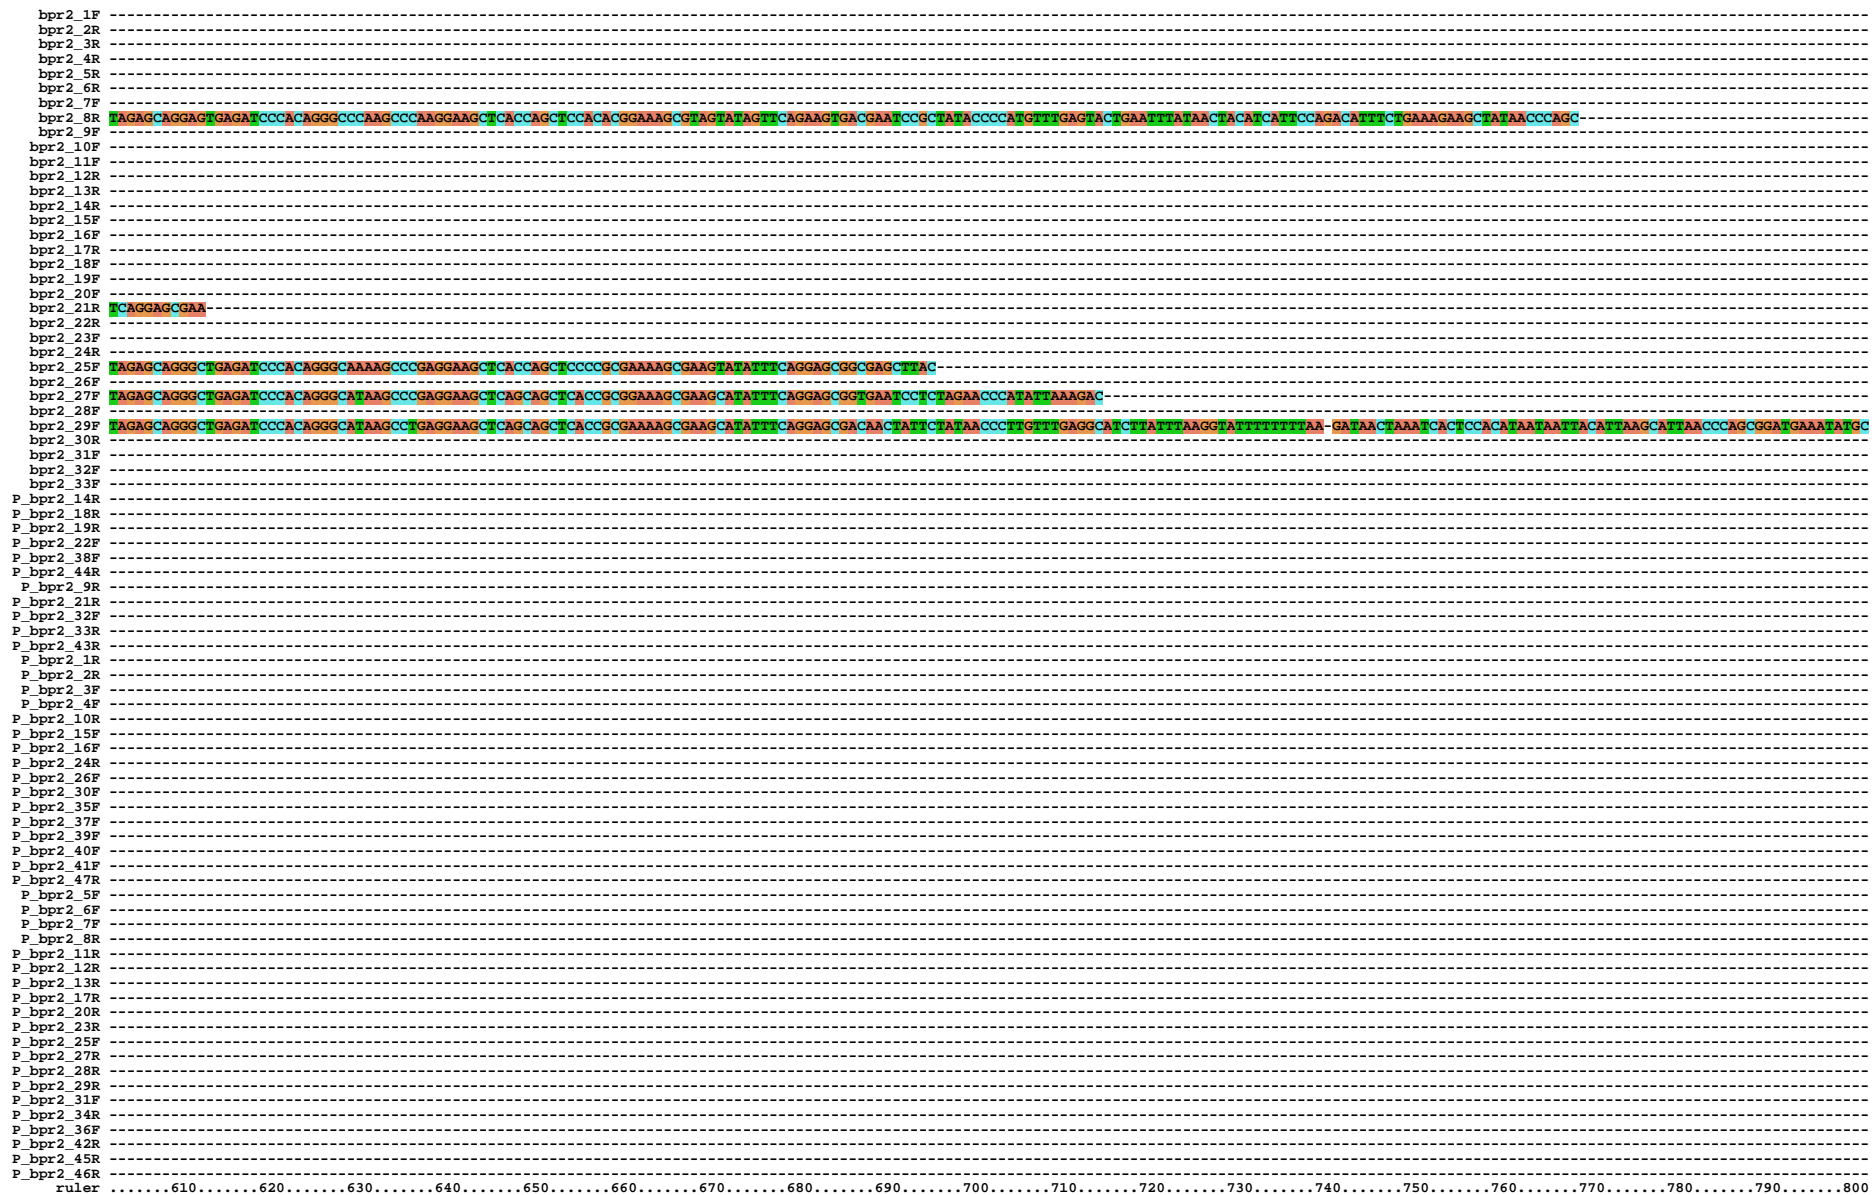

Fig.S5



bpr2\_1F -----  
 bpr2\_2R -----  
 bpr2\_3R -----  
 bpr2\_4R -----  
 bpr2\_5R -----  
 bpr2\_6R -----  
 bpr2\_7F -----  
 bpr2\_8R -----  
 bpr2\_9F -----  
 bpr2\_10F -----  
 bpr2\_11F -----  
 bpr2\_12R -----  
 bpr2\_13R -----  
 bpr2\_14R -----  
 bpr2\_15F -----  
 bpr2\_16F -----  
 bpr2\_17R -----  
 bpr2\_18F -----  
 bpr2\_19F -----  
 bpr2\_20F -----  
 bpr2\_21R -----  
 bpr2\_22R -----  
 bpr2\_23F -----  
 bpr2\_24R -----  
 bpr2\_25F -----  
 bpr2\_26F -----  
 bpr2\_27F -----  
 bpr2\_28F -----  
 bpr2\_29F **GAAGACCTTCGGTGCCTAGAGCAGGGCTGAGATCCCA CAGGGCTAAAGCCCGAGGAAGCTCAC TAGCTCCCCACGGAAAGCGAAGCATATTCAGGAGCGGCAGTCCGCTATTACCCATGTTTA**  
 bpr2\_30R -----  
 bpr2\_31F -----  
 bpr2\_32F -----  
 bpr2\_33F -----  
 P\_bpr2\_14R -----  
 P\_bpr2\_18R -----  
 P\_bpr2\_19R -----  
 P\_bpr2\_22F -----  
 P\_bpr2\_38F -----  
 P\_bpr2\_44R -----  
 P\_bpr2\_9R -----  
 P\_bpr2\_21R -----  
 P\_bpr2\_32F -----  
 P\_bpr2\_33R -----  
 P\_bpr2\_43R -----  
 P\_bpr2\_1R -----  
 P\_bpr2\_2R -----  
 P\_bpr2\_3F -----  
 P\_bpr2\_4F -----  
 P\_bpr2\_10R -----  
 P\_bpr2\_15F -----  
 P\_bpr2\_16F -----  
 P\_bpr2\_24R -----  
 P\_bpr2\_26F -----  
 P\_bpr2\_30F -----  
 P\_bpr2\_35F -----  
 P\_bpr2\_37F -----  
 P\_bpr2\_39F -----  
 P\_bpr2\_40F -----  
 P\_bpr2\_41F -----  
 P\_bpr2\_47R -----  
 P\_bpr2\_5F -----  
 P\_bpr2\_6F -----  
 P\_bpr2\_7F -----  
 P\_bpr2\_8R -----  
 P\_bpr2\_11R -----  
 P\_bpr2\_12R -----  
 P\_bpr2\_13R -----  
 P\_bpr2\_17R -----  
 P\_bpr2\_20R -----  
 P\_bpr2\_23R -----  
 P\_bpr2\_25F -----  
 P\_bpr2\_27R -----  
 P\_bpr2\_28R -----  
 P\_bpr2\_29R -----  
 P\_bpr2\_31F -----  
 P\_bpr2\_34R -----  
 P\_bpr2\_36F -----  
 P\_bpr2\_42R -----  
 P\_bpr2\_45R -----  
 P\_bpr2\_46R -----  
 ruler .....810.....820.....830.....840.....850.....860.....870.....880.....890.....900.....910.....920.....

---

Fig.S5

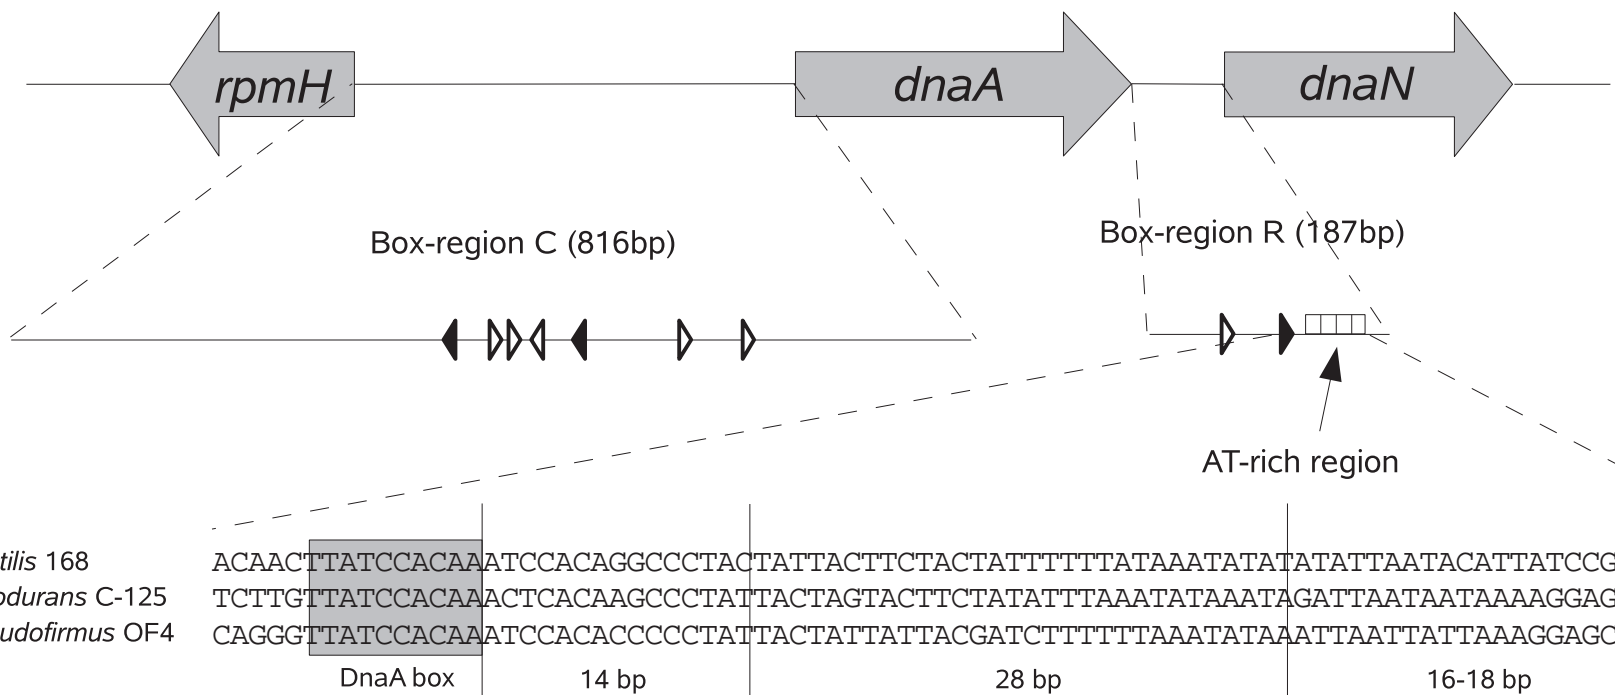

**Fig. S6**

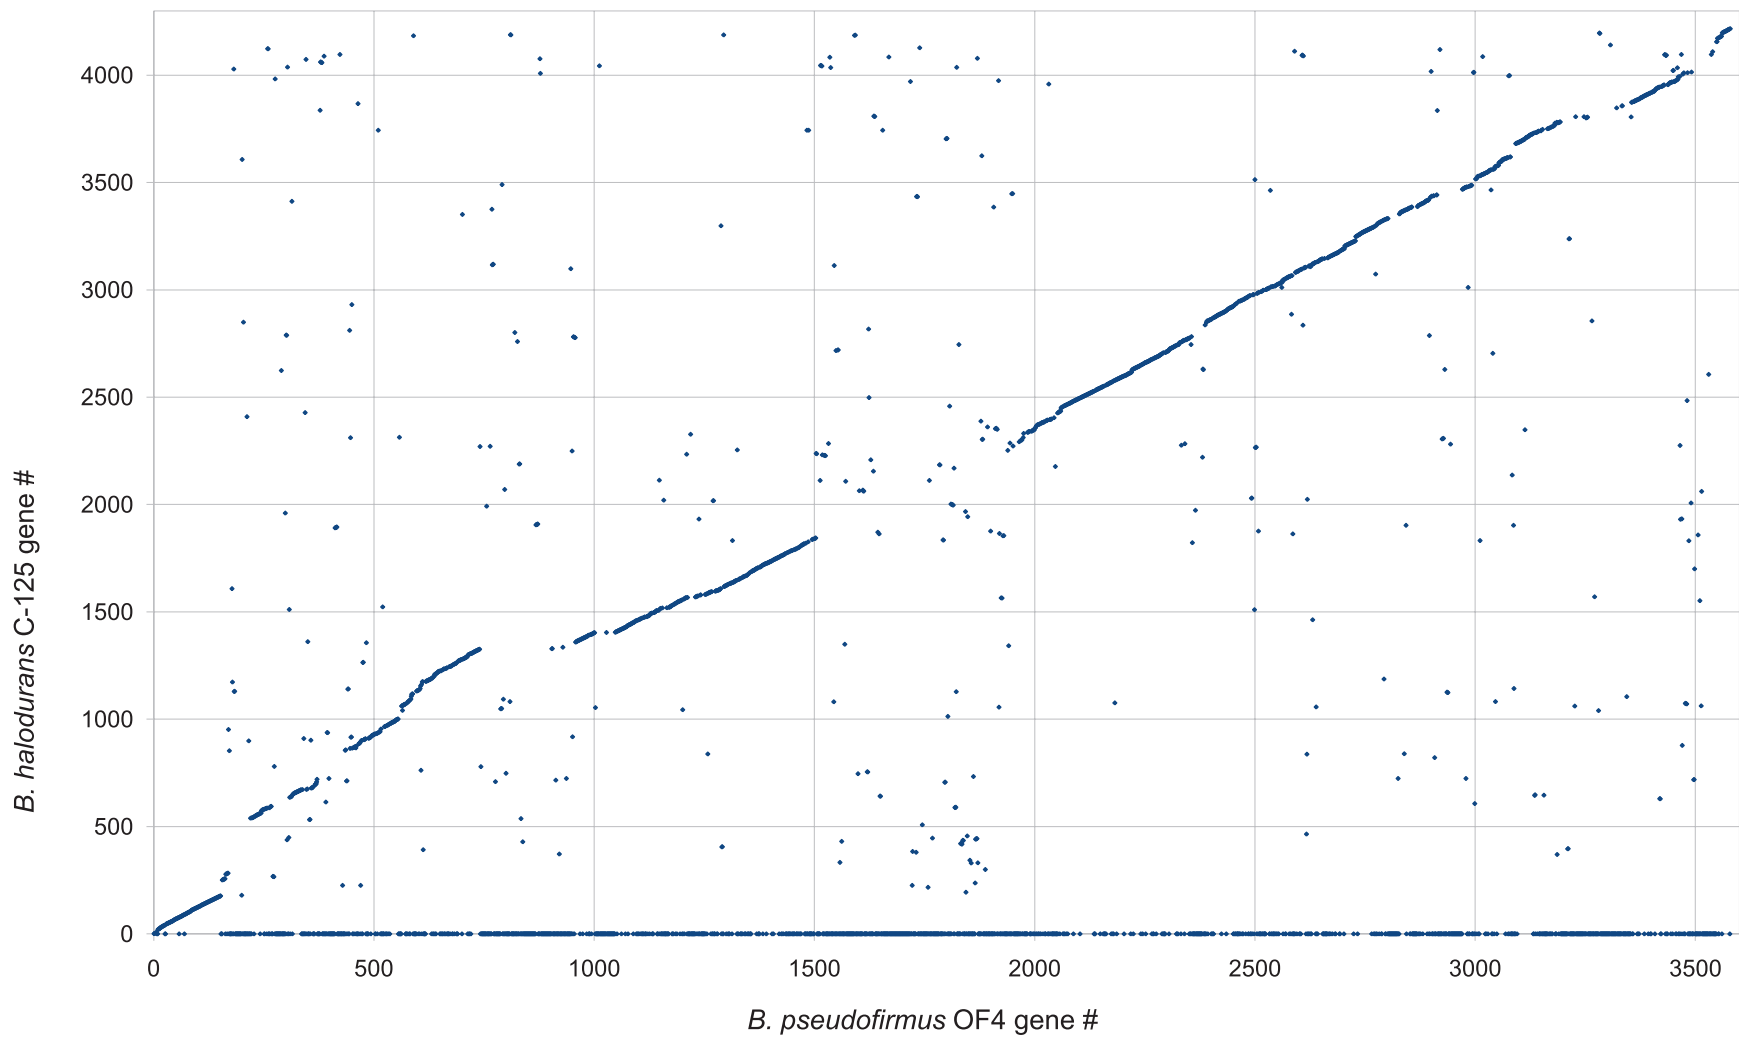

**Fig. S7**
